# Supplementary material
Source: MDPI journal article supplement (https://www.mdpi.com/1424-2818/15/1/80)
Supplement: s1 [file s1]

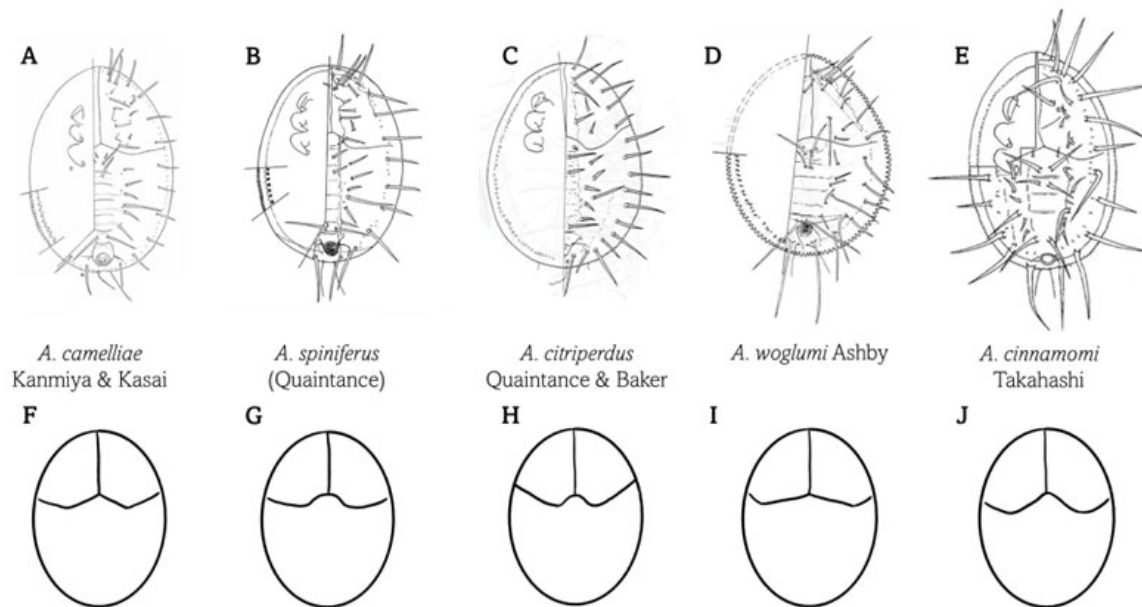

**Figure S1.** Variation of transverse molting suture of *Aleurocanthus* species. (A) Species illustration of Kanmiya & Kasai [1]; (B–D) Species illustration of Gillespie [2]; (E) Species illustration of Dubey & Ko [3]. (F–J) Simplification of molting suture pattern.

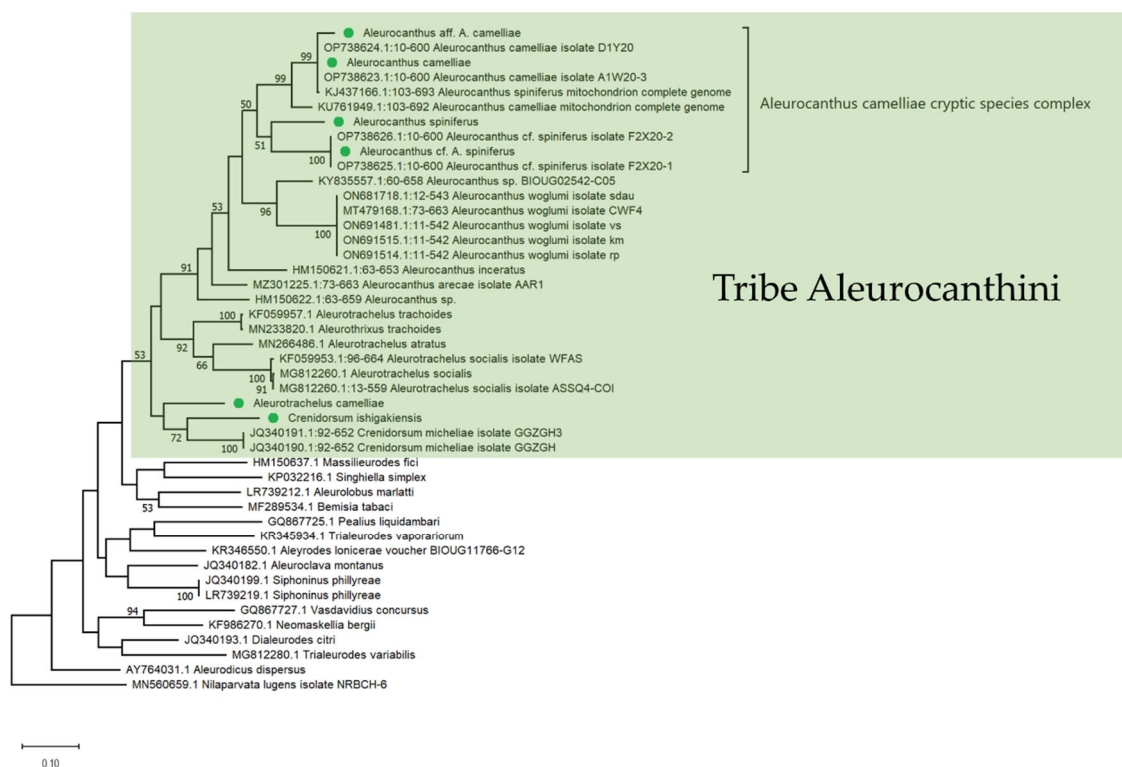

**Figure S2.** The ML phylogenetic tree of Tribe Aleurocanthini based on the mtCOI [4], using Tamuna & Nei model [5]. The bootstraps value less than 50% are hidden.

**Table S1.** MtCOI sequences from the GenBank database analyzed.

|    | Code          | Identity                                                                                                                                      |
|----|---------------|-----------------------------------------------------------------------------------------------------------------------------------------------|
| 1  | AB536792.1AS  | AB536792.1 <i>Aleurocanthus spiniferus</i> mitochondrial COI gene for cytochrome oxidase subunit I partial cds isolate: Citrus-Toshima        |
| 2  | AB536793.1AS  | AB536793.1 <i>Aleurocanthus spiniferus</i> mitochondrial COI gene for cytochrome oxidase subunit I partial cds isolate: Citrus-Ashikita       |
| 3  | AB536794.1AC  | AB536794.1 <i>Aleurocanthus camelliae</i> mitochondrial COI gene for cytochrome oxidase subunit I partial cds isolate: Camellia-Uji           |
| 4  | AB536796.1AC  | AB536796.1 <i>Aleurocanthus camelliae</i> mitochondrial COI gene for cytochrome oxidase subunit I partial cds isolate: Camellia-Yagyuu        |
| 5  | AB536797.1AC  | AB536797.1 <i>Aleurocanthus camelliae</i> mitochondrial COI gene for cytochrome oxidase subunit I partial cds isolate: Camellia-Shigaraki     |
| 6  | AB536798.1AC  | AB536798.1 <i>Aleurocanthus camelliae</i> mitochondrial COI gene for cytochrome oxidase subunit I partial cds isolate: Camellia-Asamiya       |
| 7  | AB536799.1AC  | AB536799.1 <i>Aleurocanthus camelliae</i> mitochondrial COI gene for cytochrome oxidase subunit I partial cds isolate: Camellia-Toyonaka      |
| 8  | AB536800.1AC  | AB536800.1 <i>Aleurocanthus camelliae</i> mitochondrial COI gene for cytochrome oxidase subunit I partial cds isolate: Camellia-Daito         |
| 9  | AB558172.1AS  | AB615363.1 <i>Aleurocanthus spiniferus</i> mitochondrial COI gene for cytochrome oxidase subunit I partial cds                                |
| 10 | AB615363.1AC  | AB615364.1 <i>Aleurocanthus spiniferus</i> mitochondrial COI gene for cytochrome oxidase subunit I partial cds                                |
| 11 | AB615364.1AS  | AB786712.1 <i>Aleurocanthus camelliae</i> mitochondrial COI gene for cytochrome oxidase subunit I partial cds haplogroup: B2 haplotype: B2    |
| 12 | AB786712.1AC  | AB786713.1 <i>Aleurocanthus camelliae</i> mitochondrial COI gene for cytochrome oxidase subunit I partial cds haplogroup: B3 haplotype: B3-1  |
| 13 | AB786713.1AC  | AB786714.1 <i>Aleurocanthus camelliae</i> mitochondrial COI gene for cytochrome oxidase subunit I partial cds haplogroup: B3 haplotype: B3-2  |
| 14 | AB786714.1AC  | AB786715.1 <i>Aleurocanthus spiniferus</i> mitochondrial COI gene for cytochrome oxidase subunit I partial cds haplogroup: A1 haplotype: A1-2 |
| 15 | AB786715.1AS2 | AB786716.1 <i>Aleurocanthus spiniferus</i> mitochondrial COI gene for cytochrome oxidase subunit I partial cds haplogroup: A1 haplotype: A1-3 |
| 16 | AB786716.1AS  | AB786717.1 <i>Aleurocanthus spiniferus</i> mitochondrial COI gene for cytochrome oxidase subunit I partial cds haplogroup: A1 haplotype: A1-4 |
| 17 | AB786718.1AS  | AB786718.1 <i>Aleurocanthus spiniferus</i> mitochondrial COI gene for cytochrome oxidase subunit I partial cds haplogroup: A2 haplotype: A2-1 |
| 18 | AB786719.1AS  | AB786719.1 <i>Aleurocanthus spiniferus</i> mitochondrial COI gene for cytochrome oxidase subunit I partial cds haplogroup: A2 haplotype: A2-2 |
| 19 | AB786720.1AS  | AB786720.1 <i>Aleurocanthus spiniferus</i> mitochondrial COI gene for cytochrome oxidase subunit I partial cds haplogroup: A2 haplotype: A2-3 |
| 20 | AB786721.1AS  | AB786721.1 <i>Aleurocanthus spiniferus</i> mitochondrial COI gene for cytochrome oxidase subunit I partial cds haplogroup: A2 haplotype: A2-4 |
| 21 | AB786722.1AS  | AB786722.1 <i>Aleurocanthus spiniferus</i> mitochondrial COI gene for cytochrome oxidase subunit I partial cds haplogroup: A2 haplotype: A2-5 |
| 22 | AB786723.1AS  | AB786723.1 <i>Aleurocanthus spiniferus</i> mitochondrial COI gene for cytochrome oxidase subunit I partial cds haplogroup: A2 haplotype: A2-6 |
| 23 | JX281760.1AW  | JX281760.1 <i>Aleurocanthus woglumi</i> cytochrome oxidase subunit I (co1) gene partial cds mitochondrial                                     |
| 24 | LC088497.1AC  | LC088497.1 <i>Aleurocanthus camelliae</i> mitochondrial COX1 gene for cytochrome c oxidase subunit 1 partial cds haplotype: HaplB1            |
| 25 | MH700443.1AS  | MH700443.1 <i>Aleurocanthus spiniferus</i> haplotype H1 cytochrome oxidase subunit I (COI) gene partial cds mitochondrial                     |
| 26 | MH700444.1AS  | MH700444.1 <i>Aleurocanthus spiniferus</i> haplotype H2 cytochrome oxidase subunit I (COI) gene partial cds mitochondrial                     |
| 27 | MH700445.1AS  | MH700445.1 <i>Aleurocanthus spiniferus</i> haplotype H3 cytochrome oxidase subunit I (COI) gene partial cds mitochondrial                     |
| 28 | MH700446.1AS  | MH700446.1 <i>Aleurocanthus spiniferus</i> haplotype H4 cytochrome oxidase subunit I (COI) gene partial cds mitochondrial                     |
| 29 | MN662884.1AS  | MN662884.1 <i>Aleurocanthus spiniferus</i> isolate ASPI PE1 cytochrome c oxidase subunit I (COI) gene partial cds mitochondrial               |
| 30 | MN662885.1AS  | MN662885.1 <i>Aleurocanthus spiniferus</i> isolate ASPI PE2 cytochrome c oxidase subunit I (COI) gene partial cds mitochondrial               |
| 31 | MN662886.1AS  | MN662886.1 <i>Aleurocanthus spiniferus</i> isolate ASPI PE3 cytochrome c oxidase subunit I (COI) gene partial cds mitochondrial               |

|    |              |                                                                                                                                  |
|----|--------------|----------------------------------------------------------------------------------------------------------------------------------|
| 32 | MN662887.1AS | MN662887.1 <i>Aleurocanthus spiniferus</i> isolate ASPI PE4 cytochrome c oxidase subunit I (COI) gene partial cds mitochondrial  |
| 33 | MN662888.1AS | MN662888.1 <i>Aleurocanthus spiniferus</i> isolate ASPI R1 cytochrome c oxidase subunit I (COI) gene partial cds mitochondrial   |
| 34 | MN662889.1AS | MN662889.1 <i>Aleurocanthus spiniferus</i> isolate ASPI R2 cytochrome c oxidase subunit I (COI) gene partial cds mitochondrial   |
| 35 | MN662890.1AS | MN662890.1 <i>Aleurocanthus spiniferus</i> isolate ASPI C2 cytochrome c oxidase subunit I (COI) gene partial cds mitochondrial   |
| 36 | MN662891.1AS | MN662891.1 <i>Aleurocanthus spiniferus</i> isolate ASPI C3 cytochrome c oxidase subunit I (COI) gene partial cds mitochondrial   |
| 37 | MN662892.1AS | MN662892.1 <i>Aleurocanthus spiniferus</i> isolate ASPI C4 cytochrome c oxidase subunit I (COI) gene partial cds mitochondrial   |
| 38 | MN662893.1AS | MN662893.1 <i>Aleurocanthus spiniferus</i> isolate ASPI SG1 cytochrome c oxidase subunit I (COI) gene partial cds mitochondrial  |
| 39 | MN662894.1AS | MN662894.1 <i>Aleurocanthus spiniferus</i> isolate ASPI SG2 cytochrome c oxidase subunit I (COI) gene partial cds mitochondrial  |
| 40 | MN662895.1AS | MN662895.1 <i>Aleurocanthus spiniferus</i> isolate ASPI SG3 cytochrome c oxidase subunit I (COI) gene partial cds mitochondrial  |
| 41 | MN662896.1AS | MN662896.1 <i>Aleurocanthus spiniferus</i> isolate ASPI SG4 cytochrome c oxidase subunit I (COI) gene partial cds mitochondrial  |
| 42 | MN662897.1AS | MN662897.1 <i>Aleurocanthus spiniferus</i> isolate ASPI SG5 cytochrome c oxidase subunit I (COI) gene partial cds mitochondrial  |
| 43 | MN662898.1AS | MN662898.1 <i>Aleurocanthus spiniferus</i> isolate ASPI SG6 cytochrome c oxidase subunit I (COI) gene partial cds mitochondrial  |
| 44 | MN662899.1AS | MN662899.1 <i>Aleurocanthus spiniferus</i> isolate ASPI SG7 cytochrome c oxidase subunit I (COI) gene partial cds mitochondrial  |
| 45 | MN662900.1AS | MN662900.1 <i>Aleurocanthus spiniferus</i> isolate ASPI SG8 cytochrome c oxidase subunit I (COI) gene partial cds mitochondrial  |
| 46 | MN662901.1AS | MN662901.1 <i>Aleurocanthus spiniferus</i> isolate ASPI SG9 cytochrome c oxidase subunit I (COI) gene partial cds mitochondrial  |
| 47 | MN662902.1AS | MN662902.1 <i>Aleurocanthus spiniferus</i> isolate ASPI SG10 cytochrome c oxidase subunit I (COI) gene partial cds mitochondrial |
| 48 | MN662903.1AS | MN662903.1 <i>Aleurocanthus spiniferus</i> isolate ASPI S2 cytochrome c oxidase subunit I (COI) gene partial cds mitochondrial   |
| 49 | MN662904.1AS | MN662904.1 <i>Aleurocanthus spiniferus</i> isolate ASPI S3 cytochrome c oxidase subunit I (COI) gene partial cds mitochondrial   |
| 50 | MN662905.1AS | MN662905.1 <i>Aleurocanthus spiniferus</i> isolate ASPI S4 cytochrome c oxidase subunit I (COI) gene partial cds mitochondrial   |
| 51 | MN662906.1AS | MN662906.1 <i>Aleurocanthus spiniferus</i> isolate ASPI S5 cytochrome c oxidase subunit I (COI) gene partial cds mitochondrial   |
| 52 | MN662907.1AS | MN662907.1 <i>Aleurocanthus spiniferus</i> isolate ASPI S6 cytochrome c oxidase subunit I (COI) gene partial cds mitochondrial   |
| 53 | MN662908.1AS | MN662908.1 <i>Aleurocanthus spiniferus</i> isolate ASPI S7 cytochrome c oxidase subunit I (COI) gene partial cds mitochondrial   |
| 54 | MN662909.1AS | MN662909.1 <i>Aleurocanthus spiniferus</i> isolate ASPI B3 cytochrome c oxidase subunit I (COI) gene partial cds mitochondrial   |
| 55 | MN662910.1AS | MN662910.1 <i>Aleurocanthus spiniferus</i> isolate ASPI B4 cytochrome c oxidase subunit I (COI) gene partial cds mitochondrial   |
| 56 | MN662911.1AS | MN662911.1 <i>Aleurocanthus spiniferus</i> isolate ASPI B5 cytochrome c oxidase subunit I (COI) gene partial cds mitochondrial   |
| 57 | MN662912.1AS | MN662912.1 <i>Aleurocanthus spiniferus</i> isolate ASPI A1 cytochrome c oxidase subunit I (COI) gene partial cds mitochondrial   |
| 58 | MN662913.1AS | MN662913.1 <i>Aleurocanthus spiniferus</i> isolate ASPI A2 cytochrome c oxidase subunit I (COI) gene partial cds mitochondrial   |
| 59 | MN662914.1AS | MN662914.1 <i>Aleurocanthus spiniferus</i> isolate ASPI A3 cytochrome c oxidase subunit I (COI) gene partial cds mitochondrial   |
| 60 | MN662915.1AS | MN662915.1 <i>Aleurocanthus spiniferus</i> isolate ASPI A5 cytochrome c oxidase subunit I (COI) gene partial cds mitochondrial   |
| 61 | MN662916.1AS | MN662916.1 <i>Aleurocanthus spiniferus</i> isolate ASPI C1 cytochrome c oxidase subunit I (COI) gene partial cds mitochondrial   |
| 62 | MN662917.1AS | MN662917.1 <i>Aleurocanthus spiniferus</i> isolate ASPI M1 cytochrome c oxidase subunit I (COI) gene partial cds mitochondrial   |
| 63 | MN662918.1AS | MN662918.1 <i>Aleurocanthus spiniferus</i> isolate ASPI M2 cytochrome c oxidase subunit I (COI) gene partial cds mitochondrial   |
| 64 | MN662919.1AS | MN662919.1 <i>Aleurocanthus spiniferus</i> isolate ASPI M3 cytochrome c oxidase subunit I (COI) gene partial cds mitochondrial   |

|    |               |                                                                                                                                 |
|----|---------------|---------------------------------------------------------------------------------------------------------------------------------|
| 65 | MN662920.1AS  | MN662920.1 <i>Aleurocanthus spiniferus</i> isolate ASPI P1 cytochrome c oxidase subunit I (COI) gene partial cds mitochondrial  |
| 66 | MN662921.1AS  | MN662921.1 <i>Aleurocanthus spiniferus</i> isolate ASPI P2 cytochrome c oxidase subunit I (COI) gene partial cds mitochondrial  |
| 67 | MN662922.1AS  | MN662922.1 <i>Aleurocanthus spiniferus</i> isolate ASPI S1 cytochrome c oxidase subunit I (COI) gene partial cds mitochondrial  |
| 68 | MN662923.1AS  | MN662923.1 <i>Aleurocanthus spiniferus</i> isolate ASPI B1 cytochrome c oxidase subunit I (COI) gene partial cds mitochondrial  |
| 69 | MN662924.1 AS | MN662924.1 <i>Aleurocanthus spiniferus</i> isolate ASPI B2 cytochrome c oxidase subunit I (COI) gene partial cds mitochondrial  |
| 70 | MN662925.1AS  | MN662925.1 <i>Aleurocanthus spiniferus</i> isolate ASPI PE5 cytochrome c oxidase subunit I (COI) gene partial cds mitochondrial |
| 71 | OP323039.1AC  | OP323039.1 <i>Aleurocanthus camelliae</i> isolate A1V10 cytochrome c oxidase subunit I (COX1) gene partial cds mitochondrial    |
| 72 | OP323040.1AC  | OP323040.1 <i>Aleurocanthus camelliae</i> isolate A1V11 cytochrome c oxidase subunit I (COX1) gene partial cds mitochondrial    |
| 73 | OP323041.1AC  | OP323041.1 <i>Aleurocanthus camelliae</i> isolate A1V17 cytochrome c oxidase subunit I (COX1) gene partial cds mitochondrial    |
| 74 | OP323042.1AC  | OP323042.1 <i>Aleurocanthus camelliae</i> isolate A1V18 cytochrome c oxidase subunit I (COX1) gene partial cds mitochondrial    |
| 75 | OP323043.1AC  | OP323043.1 <i>Aleurocanthus camelliae</i> isolate A1V19 cytochrome c oxidase subunit I (COX1) gene partial cds mitochondrial    |
| 76 | OP323044.1AC  | OP323044.1 <i>Aleurocanthus camelliae</i> isolate A1V20 cytochrome c oxidase subunit I (COX1) gene partial cds mitochondrial    |
| 77 | OP323045.1AC  | OP323045.1 <i>Aleurocanthus camelliae</i> isolate A1W20 cytochrome c oxidase subunit I (COX1) gene partial cds mitochondrial    |
| 78 | OP323046.1AC  | OP323046.1 <i>Aleurocanthus camelliae</i> isolate A1X21 cytochrome c oxidase subunit I (COX1) gene partial cds mitochondrial    |
| 79 | OP323047.1AC  | OP323047.1 <i>Aleurocanthus camelliae</i> isolate A1Y20 cytochrome c oxidase subunit I (COX1) gene partial cds mitochondrial    |
| 80 | OP323048.1AC  | OP323048.1 <i>Aleurocanthus camelliae</i> isolate B1V09 cytochrome c oxidase subunit I (COX1) gene partial cds mitochondrial    |
| 81 | OP323049.1AC  | OP323049.1 <i>Aleurocanthus camelliae</i> isolate B1V20 cytochrome c oxidase subunit I (COX1) gene partial cds mitochondrial    |
| 82 | OP323050.1AC  | OP323050.1 <i>Aleurocanthus camelliae</i> isolate C1V11 cytochrome c oxidase subunit I (COX1) gene partial cds mitochondrial    |
| 83 | OP323051.1AC  | OP323051.1 <i>Aleurocanthus camelliae</i> isolate D1Y20 cytochrome c oxidase subunit I (COX1) gene partial cds mitochondrial    |
| 84 | OP323052.1AC  | OP323052.1 <i>Aleurocanthus camelliae</i> isolate E1V09 cytochrome c oxidase subunit I (COX1) gene partial cds mitochondrial    |
| 85 | OP323053.1AC  | OP323053.1 <i>Aleurocanthus camelliae</i> isolate E1V20 cytochrome c oxidase subunit I (COX1) gene partial cds mitochondrial    |
| 86 | OP323054.1AC  | OP323054.1 <i>Aleurocanthus camelliae</i> isolate F1W22 cytochrome c oxidase subunit I (COX1) gene partial cds mitochondrial    |
| 87 | OP323055.1AS  | OP323055.1 <i>Aleurocanthus spiniferus</i> isolate A2Z22 cytochrome c oxidase subunit I (COX1) gene partial cds mitochondrial   |
| 88 | OP323056.1AS  | OP323056.1 <i>Aleurocanthus spiniferus</i> isolate A2Z20 cytochrome c oxidase subunit I (COX1) gene partial cds mitochondrial   |
| 89 | OP323057.1ASC | OP323057.1 <i>Aleurocanthus spiniferus</i> isolate F2X20 cytochrome c oxidase subunit I (COX1) gene partial cds mitochondrial   |

---

**Table S2.** Morphological comparison of the putative tribal characters of whiteflies.

| Morphological characters of pupal case (Characters number in Manzari & Quicke, 2006) |                 |                                        |                        |                  |               |                                                      |                  |                                                      |
|--------------------------------------------------------------------------------------|-----------------|----------------------------------------|------------------------|------------------|---------------|------------------------------------------------------|------------------|------------------------------------------------------|
| Tribe                                                                                | Genus           | Pupal case margin                      | Vasiform orifice shape | Vasiform orifice | Caudal furrow | Length of seventh abdominal segment reduced medially | Abdominal rachis | Position of antenna relative to the prothoracic legs |
|                                                                                      |                 | (1)                                    | (34)                   | (37)             | (55)          | (58)                                                 | (61)             | (94)                                                 |
| Aleurocanthini<br>Takahashi                                                          | Acaudaleyrodes  | Distinctly toothed                     | Oval                   | Elevated         | Absent        | Not significantly                                    | Present          | Mesal                                                |
|                                                                                      | Aleurocanthus   | Distinctly toothed                     | Subcordate             | Elevated         | Absent        | Not significantly                                    | Present          | Mesal                                                |
|                                                                                      | Aleurotrachelus | Distinctly toothed                     | Subcordate             | Elevated         | Absent        | Not significantly                                    | Present          | Mesal                                                |
|                                                                                      | Aleurothrixus   | Distinctly toothed                     | Subcordate             | Elevated         | Absent        | Not significantly                                    | Present          | Mesal                                                |
|                                                                                      | Aleuroplatus    | Distinctly toothed                     | Subcordate             | Elevated         | Absent        | Not significantly                                    | Present          | Mesal                                                |
|                                                                                      | Crenidorsum     | Distinctly toothed                     | Subcordate             | Elevated         | Absent        | Not significantly                                    | Present          | Mesal                                                |
|                                                                                      | Tetraleurodes   | Distinctly toothed                     | Subcordate             | Elevated         | Absent        | Not significantly                                    | Present          | Mesal                                                |
| Aleurochitonini<br>Sampson                                                           | Aleurochiton    | Distinctly toothed                     | Nearly tetrahedral     | Not elevated     | Present       | Not significantly                                    | Absent           | Mesal                                                |
| Aleyrodini<br>Sampson                                                                | Aleyrodes       | Undulated and/or indistinctly indented | Nearly triangular      | Not elevated     | Present       | Not significantly                                    | Present          | Mesal                                                |
| Aleurolobini<br>Takahashi                                                            | Aleurolobus     | Distinctly toothed                     | Nearly triangular      | Not elevated     | Present       | Not significantly                                    | Present          | Mesal                                                |
| Bemisini<br>David                                                                    | Bemisia         | Undulated and/or indistinctly indented | Nearly triangular      | Not elevated     | Present       | Significantly                                        | Absent           | Mesal                                                |
| Dialeurodini<br>Sampson                                                              | Dialeurodes     | Undulated and/or indistinctly indented | Subcordate             | Not elevated     | Present       | Not significantly                                    | Absent           | Mesal                                                |
| Li-paleyrodini<br>David                                                              | Li-paleyrodes   | Undulated and/or indistinctly indented | Nearly triangular      | Not elevated     | Absent        | Significantly                                        | Absent           | Mesal                                                |
| Neomaskellini<br>Sampson                                                             | Neomaskellia    | Distinctly toothed                     | Nearly triangular      | Elevated         | Absent        | Not significantly                                    | Present          | Lateral                                              |
| Siphoninini<br>Sampson                                                               | Siphoninus      | Undulated and/or indistinctly indented | Subcordate             | Elevated         | Absent        | Not significantly                                    | Absent           | Mesal                                                |
| Trialeurodini                                                                        | Trialeurodes    | Distinctly toothed                     | Nearly triangular      | Not elevated     | Absent        | Significantly                                        | Absent           | Lateral                                              |
| Zaphanerini<br>David                                                                 | Zaphanera       | Distinctly toothed                     | Subcordate             | Elevated         | Absent        | Not significantly                                    | Present          | Mesal                                                |

## References

1. Kanmiya, K.; Ueda, S.; Kasai, A.; Yamashita, K.; Sato, Y.; Yoshiyasu, Y. Proposal of New Specific Status for Tea-Infesting Populations of the Nominal Citrus Spiny Whitefly *Aleurocanthus spiniferus* (Homoptera: Aleyrodidae). *Zootaxa* **2011**, 2797, 25–44.
2. Gillespie, P.S. Article A Review of the Whitefly Genus *Aleurocanthus* Quaintance & Baker (Hemiptera: Aleyrodidae) in Australia. *Zootaxa* **2012**, 3252, 1–42.
3. Dubey, A.K.; Ko, C.C. Sexual Dimorphism among Species of *Aleurocanthus* Quaintance & Baker (Hemiptera: Aleyrodidae) in Taiwan, with One New Species and an Identification Key. *Zootaxa* **2012**, 1–23, doi:10.11646/zootaxa.3177.1.1.
4. Folmer, O.F.; Black, M.B.; Hoeh, W.R.; Lutz, R. v; Vrijenhoek, R.C. DNA Primers for Amplification of Mitochondrial Cytochrome c Oxidase Subunit I from Diverse Metazoan Invertebrates. *Mol Mar Biol Biotechnol* **1994**, 3 5, 294–299.
5. Tamura, K.; Nei, M. Estimation of the Number of Nucleotide Substitutions in the Control Region of Mitochondrial DNA in Humans and Chimpanzees. *Mol Biol Evol* **1993**, 10, 512–526, doi:10.1093/oxfordjournals.molbev.a040023.
